# Supplementary material
Source: PubMed Central journal article supplement (PMC535360)
Supplement: pnas_101_49_17258__1.pdf [file pnas_101_49_17258__1.pdf]

Similarity (%)

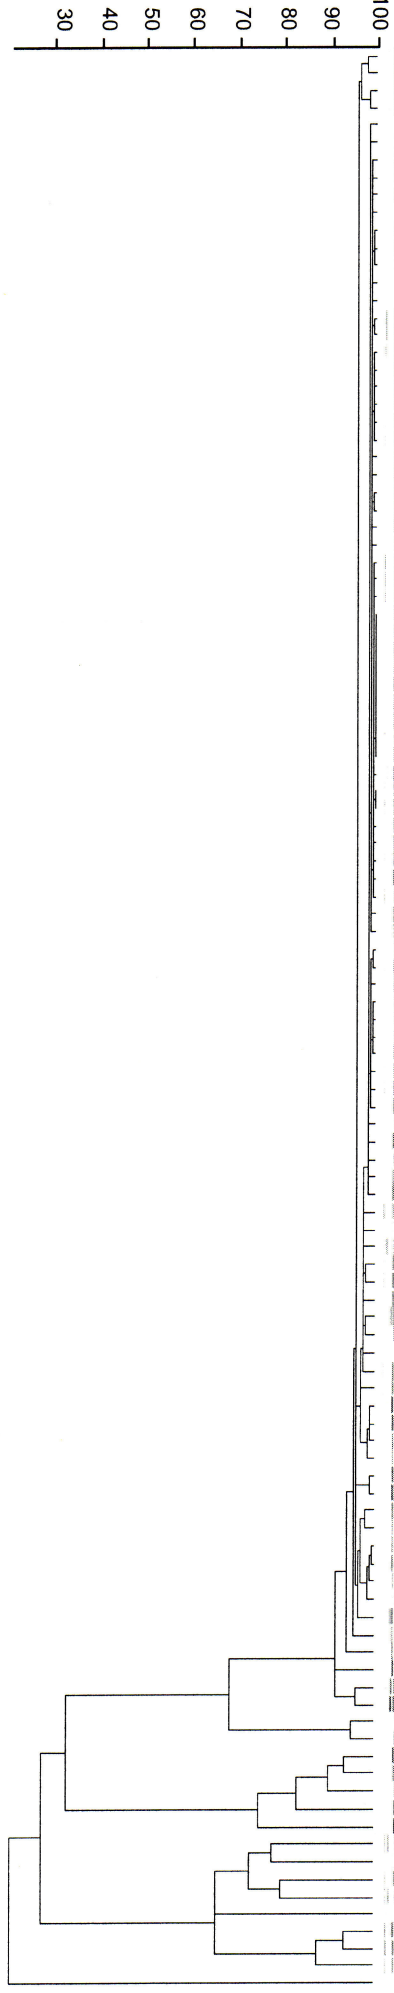

| Strain  | Serotype | Genotype | Source | Reference or Outbreak |
|---------|----------|----------|--------|-----------------------|
| F2596   | B        | 6C       | A      | VIO                   |
| F3179   | B        | 6C       | C      | VIO                   |
| F2866   | B        | 6C       | A      | VIO                   |
| F2932   | B        | 6C       | C      | VIO                   |
| RB61    | B        | 6A       | E      | VIO                   |
| RB62    | B        | 6A       | E      | VIO                   |
| R369    | B        | 6A       | C      | VIO                   |
| RB40    | B        | 6A       | E      | VIO                   |
| RB69    | B        | 6A       | E      | VIO                   |
| R322    | B        | 6A       | C      | VIO                   |
| RB46    | B        | 6A       | E      | VIO                   |
| RB90    | B        | 6A       | E      | VIO                   |
| RB11    | B        | 6A       | E      | VIO                   |
| R368    | B        | 6A       | C      | VIO                   |
| ENV153  | B        | 6A       | E      | VIO                   |
| ENV131  | B        | 6A       | E      | VIO                   |
| RB17    | B        | 6A       | E      | VIO                   |
| MAC9    | B        | 6A       | E      | VIO                   |
| RB15    | B        | 6A       | E      | VIO                   |
| RB20    | B        | 6A       | E      | VIO                   |
| RB22    | B        | 6A       | E      | VIO                   |
| RB1     | B        | 6A       | E      | VIO                   |
| RB26    | B        | 6A       | E      | VIO                   |
| RB2     | B        | 6A       | E      | VIO                   |
| RB18    | B        | 6A       | E      | VIO                   |
| ENV123  | B        | 6A       | E      | VIO                   |
| RB4     | B        | 6A       | E      | VIO                   |
| ENV130  | B        | 6A       | E      | VIO                   |
| ENV125  | B        | 6A       | E      | VIO                   |
| RB33    | B        | 6A       | E      | VIO                   |
| RB34    | B        | 6A       | E      | VIO                   |
| RB37    | B        | 6A       | E      | VIO                   |
| RB56    | B        | 6A       | E      | VIO                   |
| RB58    | B        | 6A       | E      | VIO                   |
| RB59    | B        | 6A       | E      | VIO                   |
| RB54    | B        | 6A       | E      | VIO                   |
| 152A-3  | B        | 6A       | E      | VIO                   |
| RB50    | B        | 6A       | E      | VIO                   |
| 129A-1  | B        | 6A       | E      | VIO                   |
| RB41    | B        | 6A       | E      | VIO                   |
| RB55    | B        | 6A       | E      | VIO                   |
| 152A-2  | B        | 6A       | E      | VIO                   |
| RB19    | B        | 6A       | E      | VIO                   |
| RB32    | B        | 6A       | E      | VIO                   |
| 113A-5  | B        | 6A       | E      | VIO                   |
| 152A-1  | B        | 6A       | E      | VIO                   |
| RB39    | B        | 6A       | E      | VIO                   |
| 152A-4  | B        | 6A       | E      | VIO                   |
| RB5     | B        | 6A       | E      | VIO                   |
| RB45    | B        | 6A       | E      | VIO                   |
| RB35    | B        | 6A       | E      | VIO                   |
| R498    | B        | 6A       | A      | VIO                   |
| R540    | B        | 6A       | C      | VIO                   |
| R500    | B        | 6A       | A      | VIO                   |
| R360    | B        | 6A       | C      | VIO                   |
| RB63    | B        | 6A       | E      | VIO                   |
| R265    | B        | 6A       | C      | VIO                   |
| CBS7750 | B        | 6A       | E      | REF                   |
| R268    | B        | 6A       | C      | VIO                   |
| RB3     | B        | 6A       | E      | VIO                   |
| RB13    | B        | 6A       | E      | VIO                   |
| RB14    | B        | 6A       | E      | VIO                   |
| RB48    | B        | 6A       | E      | VIO                   |
| RB96    | B        | 6A       | E      | VIO                   |
| ENV124  | B        | 6A       | E      | VIO                   |
| ENV152  | B        | 6A       | E      | VIO                   |
| RB25    | B        | 6A       | E      | VIO                   |
| E113    | B        | 6A       | E      | VIO                   |
| 152A-5  | B        | 6A       | E      | VIO                   |
| R406    | B        | 6A       | C      | VIO                   |
| R409    | B        | 6A       | C      | VIO                   |
| RB9     | B        | 6A       | E      | VIO                   |
| RB29    | B        | 6A       | E      | VIO                   |
| RB30    | B        | 6A       | E      | VIO                   |
| AOR432  | B        | 6A       | C      | VIO                   |
| R507    | B        | 6A       | C      | VIO                   |
| R271    | B        | 6A       | C      | VIO                   |
| 99MR10  | B        | 6A       | C      | VIO                   |
| R273    | B        | 6A       | C      | VIO                   |
| F3197   | B        | 6A       | C      | VIO                   |
| RB34    | B        | 6A       | C      | VIO                   |
| Ram2    | nt       | 6B       | E      | REF                   |
| RB28    | B        | 6B       | E      | VIO                   |
| RB52    | B        | 6B       | E      | VIO                   |
| RB57    | B        | 6B       | E      | VIO                   |
| ENV129  | B        | 6B       | E      | VIO                   |
| ENV133  | B        | 6B       | E      | VIO                   |
| RB67    | B        | 6B       | E      | VIO                   |
| RB31    | B        | 6B       | E      | VIO                   |
| 152A-6  | B        | 6B       | E      | VIO                   |
| R272    | B        | 6B       | C      | VIO                   |
| ARN1    | nt       | 6        | E      | REF                   |
| WM178   | B        | 6        | C      | REF                   |
| Ram5    | nt       | 6        | E      | REF                   |
| WM1008  | nt       | 6        | E      | REF                   |
| CBS6996 | nt       | 5        | C      | REF                   |
| WM161   | B        | 5        | E      | REF                   |
| WM1009  | nt       | 4        | E      | REF                   |
| WM179   | B        | 4        | C      | REF                   |
| WM830   | nt       | 4        | C      | REF                   |
| F2863   | B        | 4        | A      | VIO                   |
| R794    | B        | 4        | C      | VIO                   |
| R314    | D        | 2        | C      | VIO                   |
| WM629   | D        | 2        | C      | REF                   |
| R270    | D        | 2        | C      | VIO                   |
| R461    | D        | 2        | C      | VIO                   |
| WM628   | AD       | 3        | C      | REF                   |
| R312    | A        | 1        | C      | VIO                   |
| R449    | A        | 1        | C      | VIO                   |
| R266    | A        | 1        | C      | VIO                   |
| WM779   | C        | 7        | A      | REF                   |
