# Supplementary material
Source: PubMed Central journal article supplement (PMC535360)
Supplement: pnas_101_49_17258__2.pdf [file pnas_101_49_17258__2.pdf]

**Table 1. Isolate information and molecular typing results for standard laboratory strains, clinical, veterinary, and environmental isolates from Vancouver Island (VI), and other global strains**

| Isolate ID                                  | Serotype | PCR-fingerprinting molecular type | URA5-RFLP molecular type | AFLP type | Mating type            | Geographical origin        | Host factors    | Specific source                          |
|---------------------------------------------|----------|-----------------------------------|--------------------------|-----------|------------------------|----------------------------|-----------------|------------------------------------------|
| Molecular standard laboratory strains       |          |                                   |                          |           |                        |                            |                 |                                          |
| WM148                                       | A        | VNI                               | VNI                      | 1         | $\alpha^{\dagger}$     | Sydney, Australia          | HIV+            | CSF                                      |
| WM626                                       | A        | VNII                              | VNII                     | 1A        | $\alpha^{\dagger}$     | Sydney                     | Immunocompetent | CSF                                      |
| WM628                                       | AD       | VNIII                             | VNIII                    | 3         | $a/\alpha^{\dagger}$   | Melbourne, Australia       | HIV+            | CSF                                      |
| WM629                                       | D        | VNIV                              | VNIV                     | 2         | $\alpha^{\dagger}$     | Melbourne                  | HIV             | Blood                                    |
| WM179                                       | B        | VGI                               | VGI                      | 4         | $\alpha^{\dagger}$     | Sydney                     | Immunocompetent | CSF                                      |
| WM178                                       | B        | VGII                              | VGII                     | 6         | $\alpha^{\dagger}$     | Sydney                     | Immunocompetent | CSF                                      |
| WM161                                       | B        | VGIII                             | VGIII                    | 5         | $\alpha^{\dagger}$     | San Diego, CA              | N/A             | <i>E. camaldulensis</i> wood from hollow |
| WM779                                       | C        | VGIV                              | VGIV                     | 7         | $\alpha^{\dagger}$     | Johannesburg, South Africa | N/A             | Cheetah                                  |
| Clinical isolates, British Columbia, Canada |          |                                   |                          |           |                        |                            |                 |                                          |
| 99M R10                                     | B        | VGIIa                             | VGII                     | 6A        | $\alpha^{\dagger}$     | Vancouver                  | Immunocompetent | Male, CSF                                |
| A0M R432                                    | B        | VGIIa                             | VGII                     | 6A        | $\alpha^{\dagger}$     | Victoria, VI, Canada       | Immunocompetent | Female, CSF                              |
| A1M R265                                    | B        | VGIIa                             | VGII                     | 6A        | $\alpha^{\dagger}$     | Duncan, VI                 | Immunocompetent | Male, bronchial wash                     |
| A1M R266*                                   | A        | VNI                               | VNI                      | 1         | Not typed              | Victoria                   | HIV+            | Male, bronchial wash                     |
| A1M R268                                    | B        | VGIIa                             | VGII                     | 6A        | $\alpha^{\dagger}$     | Lantzville, VI             | Immunocompetent | Female, CSF                              |
| A1M R269                                    | B        | VGIIa                             | VGII                     | 6A        | $\alpha^{\dagger}$     | Victoria                   | Immunocompetent | Female, bronchial wash                   |
| A1M R270*                                   | D        | VNIV                              | VNIV                     | 2         | Not typed              | Data not available         | HIV+            | BAL                                      |
| A1M R271                                    | B        | VGIIa                             | VGII                     | 6A        | $\alpha^{\dagger}$     | Nanoose Bay, VI            | Immunocompetent | Male, BAL                                |
| A1M R272                                    | B        | VGIIb                             | VGII                     | 6B        | No mating <sup>†</sup> | Ladysmith, VI              | Immunocompetent | Female, BAL                              |
| A1M R273                                    | B        | VGIIa                             | VGII                     | 6A        | $\alpha^{\dagger}$     | Victoria                   | Immunocompetent | Male, BAL                                |
| A1M R312*                                   | A        | VNI                               | VNI                      | 1         | Not typed              | Victoria                   | HIV+            | Male, blood                              |
| A1M R314*                                   | D        | VNIV                              | VNIV                     | 2         | Not typed              | Victoria                   | HIV+            | Male, blood                              |
| A1M R322                                    | B        | VGIIa                             | VGII                     | 6A        | $\alpha^{\dagger}$     | Parksville, VI             | Immunocompetent | Female, CSF                              |
| A1M R360                                    | B        | VGIIa                             | VGII                     | 6A        | $\alpha^{\dagger}$     | Victoria                   | Immunocompetent | Male, lung aspiration                    |
| A1M R368                                    | B        | VGIIa                             | VGII                     | 6A        | $\alpha^{\dagger}$     | Victoria                   | Immunocompetent | Male, CSF                                |
| A1M R369                                    | B        | VGIIa                             | VGII                     | 6A        | $\alpha^{\dagger}$     | Victoria                   | Immunocompetent | Male, CSF                                |
| A1M R406                                    | B        | VGIIa                             | VGII                     | 6A        | $\alpha^{\dagger}$     | Nanaimo, VI                | Immunocompetent | Female, CSF                              |
| A1M R409                                    | B        | VGIIa                             | VGII                     | 6A        | $\alpha^{\dagger}$     | Victoria                   | Immunocompetent | Female, BAL                              |
| A1M R449*                                   | A        | VNI                               | VNI                      | 1         | Not typed              | Victoria                   | HIV+            | Female, CSF                              |
| A1M R461*                                   | D        | VNIV                              | VNIV                     | 2         | Not typed              | Vancouver                  | HIV+            | Female, BAL                              |
| A1M R507                                    | B        | VGIIa                             | VGII                     | 6A        | $\alpha^{\dagger}$     | Vancouver                  | Immunocompetent | Female, CSF                              |
| A1M R540                                    | B        | VGIIa                             | VGII                     | 6A        | $\alpha^{\dagger}$     | Victoria                   | Immunocompetent | Male, CSF                                |
| A1M R634                                    | B        | VGIIa                             | VGII                     | 6A        | $\alpha^{\dagger}$     | Victoria                   | Immunocompetent | Male, lung aspiration                    |
| A1M R794                                    | B        | VGI                               | VGI                      | 4         | No mating <sup>†</sup> | Vancouver                  | Immunocompetent | Female, CSF                              |

|                                          |   |       |      |    |                        |                                        |                 |                                                     |
|------------------------------------------|---|-------|------|----|------------------------|----------------------------------------|-----------------|-----------------------------------------------------|
| A1M F2932                                | B | VGIIa | VGII | 6C | $\alpha^\dagger$       | Kelowna                                | Immunocompetent | Male, lung                                          |
| A1M F3179                                | B | VGIIa | VGII | 6C | $\alpha^\dagger$       | Vancouver                              | Immunocompetent | Male, sputum                                        |
| A1M F3197                                | B | VGIIa | VGII | 6A | $\alpha^\dagger$       | Black Creek, VI                        | Immunocompetent | Male, BAL                                           |
| Veterinary isolates, British Columbia    |   |       |      |    |                        |                                        |                 |                                                     |
| A1M R498                                 | B | VGIIa | VGII | 6A | $\alpha^\dagger$       | Victoria                               | N/A             | Pet cat, sinus tract swab                           |
| A1M R500                                 | B | VGIIa | VGII | 6A | $\alpha^\dagger$       | Victoria                               | N/A             | Pet cat, sinus tract swab                           |
| A1M F2863                                | B | VGI   | VGI  | 4  | $\alpha^\dagger$       | Shores of Gulf Island<br>(close to VI) | N/A             | Dead wild Dall's porpoise<br>mediastinal lymph node |
| A1M F2866                                | B | VGIIa | VGII | 6C | No mating <sup>†</sup> | Shores of Gulf Island                  | N/A             | Dead wild Dall's porpoise<br>lymph node             |
| A1M F2596                                | B | VGIIa | VGII | 6C | $\alpha^\dagger$       | Nanaimo                                | N/A             | Pet dog, lump on head                               |
| A1M F3016                                | B | VGIIa | VGII | 6A | $\alpha^\dagger$       | Shores of Gulf Island                  | N/A             | Dead wild Dall's porpoise<br>lymph node             |
| Environmental isolates, British Columbia |   |       |      |    |                        |                                        |                 |                                                     |
| E113                                     | B | VGIIa | VGII | 6A | $\alpha^\dagger$       | RBPP, Parksville, VI                   | N/A             | Douglas fir 113 (hollow 1: 1/1)                     |
| ENV123                                   | B | VGIIa | VGII | 6A | $\alpha^\dagger$       | RBPP                                   | N/A             | Douglas fir 113 (hollow 2: 1/1)                     |
| ENV124                                   | B | VGIIa | VGII | 6A | $\alpha^\dagger$       | RBPP                                   | N/A             | Soil beneath Douglas fir 113                        |
| ENV125                                   | B | VGIIa | VGII | 6A | $\alpha^\dagger$       | RBPP                                   | N/A             | Douglas fir 125                                     |
| ENV129                                   | B | VGIIb | VGII | 6B | $\alpha^\dagger$       | RBPP                                   | N/A             | Douglas fir 129                                     |
| ENV130                                   | B | VGIIa | VGII | 6A | $\alpha^\dagger$       | RBPP                                   | N/A             | Douglas fir 130                                     |
| ENV131                                   | B | VGIIa | VGII | 6A | $\alpha^\dagger$       | RBPP                                   | N/A             | Douglas fir 131                                     |
| ENV133                                   | B | VGIIb | VGII | 6B | $\alpha^\dagger$       | RBPP                                   | N/A             | Douglas fir 133                                     |
| ENV152                                   | B | VGIIa | VGII | 6A | $\alpha^\dagger$       | RBPP                                   | N/A             | Alder tree 152                                      |
| ENV153                                   | B | VGIIa | VGII | 6A | $\alpha^\dagger$       | RBPP                                   | N/A             | Alder 153                                           |
| MAC-9                                    | B | VGIIa | VGII | 6A | $\alpha^\dagger$       | MMP, Cathedral Grove, VI               | N/A             | Cedar tree 296                                      |
| RB1                                      | B | VGIIa | VGII | 6A | $\alpha^\dagger$       | RBPP                                   | N/A             | Retest of Douglas fir 113<br>(hollow 2: 1/6)        |
| RB2                                      | B | VGIIa | VGII | 6A | $\alpha^\dagger$       | RBPP                                   | N/A             | Retest of Douglas fir 113<br>(hollow 2: 2/6)        |
| RB3                                      | B | VGIIa | VGII | 6A | $\alpha^\dagger$       | RBPP                                   | N/A             | Retest of Douglas fir 113<br>(hollow 2: 3/6)        |
| RB4                                      | B | VGIIa | VGII | 6A | $\alpha^\dagger$       | RBPP                                   | N/A             | Retest of Douglas fir 113<br>(hollow 2: 4/6)        |
| RB5                                      | B | VGIIa | VGII | 6A | $\alpha^\dagger$       | RBPP                                   | N/A             | Retest of Douglas fir 113<br>(hollow 2: 5/6)        |
| RB8                                      | B | VGIIa | VGII | 6A | $\alpha^\dagger$       | RBPP                                   | N/A             | Retest of Douglas fir 113<br>(hollow 3: 1/3)        |
| RB9                                      | B | VGIIa | VGII | 6A | $\alpha^\dagger$       | RBPP                                   | N/A             | Retest of Douglas fir 113<br>(hollow 4: 1/3)        |
| RB11                                     | B | VGIIa | VGII | 6A | $\alpha^\dagger$       | RBPP                                   | N/A             | Retest of Douglas fir 113                           |

|      |   |       |      |    |                    |      |     |                                                                 |
|------|---|-------|------|----|--------------------|------|-----|-----------------------------------------------------------------|
| RB13 | B | VGIIa | VGII | 6A | $\alpha^{\dagger}$ | RBPP | N/A | (hollow 1: 1/1)<br>Retest of Douglas fir 113<br>(hollow 3: 2/3) |
| RB14 | B | VGIIa | VGII | 6A | $\alpha^{\dagger}$ | RBPP | N/A | Retest of Douglas fir 113<br>(hollow 4: 2/3)                    |
| RB15 | B | VGIIa | VGII | 6A | $\alpha^{\dagger}$ | RBPP | N/A | Retest of Douglas fir 113<br>(hollow 5: 1/2)                    |
| RB17 | B | VGIIa | VGII | 6A | $\alpha^{\dagger}$ | RBPP | N/A | Retest of Douglas fir 113<br>(hollow 2: 6/6)                    |
| RB18 | B | VGIIa | VGII | 6A | $\alpha^{\dagger}$ | RBPP | N/A | Retest of Douglas fir 113<br>(hollow 3: 3/3)                    |
| RB19 | B | VGIIa | VGII | 6A | $\alpha^{\dagger}$ | RBPP | N/A | Retest of Douglas fir 113<br>(hollow 4: 3/3)                    |
| RB20 | B | VGIIa | VGII | 6A | $\alpha^{\dagger}$ | RBPP | N/A | Retest of Douglas fir 113<br>(hollow 5: 2/2 )                   |
| RB22 | B | VGIIa | VGII | 6A | $\alpha^{\dagger}$ | RBPP | N/A | Retest of alder 153 (hollow 1: 1/2)                             |
| RB25 | B | VGIIa | VGII | 6A | $\alpha^{\dagger}$ | RBPP | N/A | Retest of alder 153 (hollow 1: 2/2)                             |
| RB26 | B | VGIIa | VGII | 6A | $\alpha^{\dagger}$ | RBPP | N/A | Retest of alder 153 (hollow 2: 1/1)                             |
| RB28 | B | VGIIb | VGII | 6B | $\alpha^{\dagger}$ | RBPP | N/A | Douglas fir stump (swab 1/1)                                    |
| RB29 | B | VGIIa | VGII | 6A | $\alpha^{\dagger}$ | RBPP | N/A | Douglas fir 194                                                 |
| RB30 | B | VGIIa | VGII | 6A | $\alpha^{\dagger}$ | RBPP | N/A | Douglas fir 195 (composite swab)                                |
| RB31 | B | VGIIb | VGII | 6B | $\alpha^{\dagger}$ | RBPP | N/A | Douglas fir 196 (composite swab)                                |
| RB32 | B | VGIIa | VGII | 6A | $\alpha^{\dagger}$ | RBPP | N/A | Alder 197 (composite swab)                                      |
| RB33 | B | VGIIa | VGII | 6A | $\alpha^{\dagger}$ | RBPP | N/A | Young Douglas fir 198<br>(composite swab)                       |
| RB34 | B | VGIIa | VGII | 6A | $\alpha^{\dagger}$ | RBPP | N/A | Douglas fir 199 (composite swab)                                |
| RB35 | B | VGIIa | VGII | 6A | $\alpha^{\dagger}$ | RBPP | N/A | Douglas fir 200 (composite swab)                                |
| RB37 | B | VGIIa | VGII | 6A | $\alpha^{\dagger}$ | RBPP | N/A | Retest of Douglas fir 125                                       |
| RB39 | B | VGIIa | VGII | 6A | $\alpha^{\dagger}$ | RBPP | N/A | Douglas fir 203                                                 |
| RB40 | B | VGIIa | VGII | 6A | $\alpha^{\dagger}$ | RBPP | N/A | Retest of Douglas fir 125 (hollow 1)                            |
| RB41 | B | VGIIa | VGII | 6A | $\alpha^{\dagger}$ | RBPP | N/A | Retest of Douglas fir 125 (hollow 2)                            |
| RB45 | B | VGIIa | VGII | 6A | $\alpha^{\dagger}$ | RBPP | N/A | Retest of alder 152 (swab 2/5)                                  |
| RB46 | B | VGIIa | VGII | 6A | $\alpha^{\dagger}$ | RBPP | N/A | Retest of alder 152 (swab 3/5)                                  |
| RB48 | B | VGIIa | VGII | 6A | $\alpha^{\dagger}$ | RBPP | N/A | Retest of alder 152 (swab 5/5)                                  |
| RB50 | B | VGIIa | VGII | 6A | $\alpha^{\dagger}$ | RBPP | N/A | Alder 167 (composite swab)                                      |
| RB52 | B | VGIIb | VGII | 6B | $\alpha^{\dagger}$ | RBPP | N/A | Grand fir tree 169                                              |
| RB54 | B | VGIIa | VGII | 6A | $\alpha^{\dagger}$ | RBPP | N/A | Young Douglas fir 171<br>(composite swab)                       |
| RB55 | B | VGIIa | VGII | 6A | $\alpha^{\dagger}$ | RBPP | N/A | Garry oak tree 172 (composite swab)                             |
| RB56 | B | VGIIa | VGII | 6A | $\alpha^{\dagger}$ | RBPP | N/A | Garry oak 173 (composite swab)                                  |

|                                         |           |       |           |    |                   |                       |                    |                                              |
|-----------------------------------------|-----------|-------|-----------|----|-------------------|-----------------------|--------------------|----------------------------------------------|
| RB57                                    | B         | VGIIb | VGII      | 6B | $\alpha^\dagger$  | RBPP                  | N/A                | Retest of Douglas fir 126 (hollow 1: 1/2)    |
| RB58                                    | B         | VGIIa | VGII      | 6A | $\alpha^\dagger$  | RBPP                  | N/A                | Retest of Douglas fir 126 (hollow 1: 2/2)    |
| RB59                                    | B         | VGIIa | VGII      | 6A | $\alpha^\dagger$  | RBPP                  | N/A                | Retest of Douglas fir 126 (hollow 2: 1/2)    |
| RB61                                    | B         | VGIIa | VGII      | 6A | $\alpha^\dagger$  | RBPP                  | N/A                | Retest of Douglas fir 129 (swab 1/2)         |
| RB62                                    | B         | VGIIa | VGII      | 6A | $\alpha^\dagger$  | RBPP                  | N/A                | Douglas fir 129 (swab 2/2)                   |
| RB63                                    | B         | VGIIa | VGII      | 6A | $\alpha^\dagger$  | RBPP                  | N/A                | Retest of Douglas fir 129                    |
| RB67                                    | B         | VGIIb | VGII      | 6B | $\alpha^\dagger$  | RBPP                  | N/A                | Retest of Douglas fir 130 (swab 1/2)         |
| RB69                                    | B         | VGIIa | VGII      | 6A | $\alpha^\dagger$  | RBPP                  | N/A                | Retest of Douglas fir 130 (swab 2/2)         |
| RB90                                    | B         | VGIIa | VGII      | 6A | $\alpha^\dagger$  | RBPP                  | N/A                | Alder 187                                    |
| RB96                                    | B         | VGIIa | VGII      | 6A | $\alpha^\dagger$  | RBPP                  | N/A                | Retest of Douglas fir 130 (swab 1/2)         |
| 113A-5                                  | B         | VGIIa | VGII      | 6A | $\alpha^\dagger$  | RBPP                  | N/A                | Air sample, stage 5, beneath Douglas fir 113 |
| 129A-1                                  | B         | VGIIa | VGII      | 6A | $\alpha^\dagger$  | RBPP                  | N/A                | Air sample, stage 1, beneath Douglas fir 129 |
| 152A-1                                  | B         | VGIIa | VGII      | 6A | $\alpha^\dagger$  | RBPP                  | N/A                | Air sample, stage 1, beneath alder 152       |
| 152A-2                                  | B         | VGIIa | VGII      | 6A | $\alpha^\dagger$  | RBPP                  | N/A                | Air sample, stage 2, beneath alder 152       |
| 152A-3                                  | B         | VGIIa | VGII      | 6A | $\alpha^\dagger$  | RBPP                  | N/A                | Air sample, stage 3, beneath alder 152       |
| 152A-4                                  | B         | VGIIa | VGII      | 6A | $\alpha^\dagger$  | RBPP                  | N/A                | Air sample, stage 4, beneath alder 152       |
| 152A-5                                  | B         | VGIIa | VGII      | 6A | $\alpha^\dagger$  | RBPP                  | N/A                | Air sample, stage 5, beneath alder 152       |
| 152A-6                                  | B         | VGIIb | VGII      | 6B | $\alpha^\dagger$  | RBPP                  | N/A                | Air sample, stage 6, beneath alder 152       |
| Additional global VGI and VGII isolates |           |       |           |    |                   |                       |                    |                                              |
| WM830                                   | Not typed | VGI   | Not typed | 4  | Not typed         | Papua, New Guinea     | Immunocompetent    | Data not available                           |
| WM1009                                  | Not typed | VGI   | Not typed | 4  | Not typed         | Mt. Druitt, Australia | N/A                | <i>E. tereticornis</i> , larval frass        |
| CBS7748                                 | B         | VGI   | Not typed | 4  | Not typed         | Balranald, Australia  | N/A                | <i>E. camaldulensis</i> , air in hollow      |
| Ram2                                    | B         | VGII  | Not typed | 6B | Not typed         | Arnhemland, Australia | N/A                | <i>E. camaldulensis</i>                      |
| Ram5                                    | B         | VGII  | Not typed | 6  | Not typed         | Arnhemland            | N/A                | <i>E. tetradonta</i>                         |
| ARN1                                    | B         | VGII  | Not typed | 6  | Not typed         | Arnhemland            | N/A                | <i>E. camaldulensis</i>                      |
| WM1008                                  | B         | VGII  | Not typed | 6  | $\alpha^\ddagger$ | Mt. Druitt            | N/A                | <i>E. tereticornis</i> , larval frass        |
| ATCC32609<br>(= CBS6956 = NIH 444)      | B         | VGII  | Not typed | 6  | $\alpha^\ddagger$ | Seattle, WA           | Immunocompetent    | Sputum                                       |
| CBS7750                                 | B         | VGII  | Not typed | 6  | $\alpha^\ddagger$ | San Francisco, CA     | N/A                | <i>E. camaldulensis</i> bark debris          |
| NIH112                                  | B         | VGII  | Not typed | 6  | $\alpha^\ddagger$ | CA                    | Data not available | Data not available                           |

(= CBS6996 = ATCC24065)

NIH198                      Not typed                      Not typed    Not typed    a<sup>†</sup>                      Data not available                      Data not available                      Data not available

---

RBPP, Rath Trevor Beach Provincial Park; MMP, MacMillan Park; CSF, cerebrospinal fluid; BAL, bronchoalveolar lavage. Hollows in the trees included holes, niches or scars. Composite swab refers to a single swab used in several different hollows of a single tree. Retests refer to repeated sampling of trees at different time points.

\*Isolate did not meet the criteria to be considered part of the outbreak.

<sup>†</sup>Mating type determined by confrontation with tester strains.

<sup>‡</sup>Mating type previously determined by means of PCR method [Chaturvedi, S., Rodeghier, B., Fan, J., McClelland, C. M., Wickes, B. L. & Chaturvedi, V. (2000) *J. Clin. Microbiol.* **38**, 2007-2009].
